# Supplementary material for: Framework humanization optimizes potency of anti-CD72 nanobody CAR-T cells for B-cell malignancies
Source: PubMed Central journal article supplement — J Immunother Cancer. 2023 Nov 24;11(11):e006985. doi: 10.1136/jitc-2023-006985 (PMC10680002; doi:10.1136/jitc-2023-006985), 2023-11-24
Supplement: jitc-2023-006985supp001.pdf [file jitc-2023-006985supp001.pdf]

1  
2  
3  
4  
5  
6  
7  
8  
9  
10  
11  
12

**SUPPLEMENTAL MATERIALS FOR**

**Framework humanization optimizes potency of anti-CD72 nanobody CAR-T cells for B-cell malignancies**

Temple et al.

**Supplemental Methods**

**Supplemental Figures 1-10**

**Supplemental Tables 1-3**

13 **SUPPLEMENTAL METHODS**

14

15 **Human Cell lines.** Human cell lines were authenticated by short tandem repeat (STR) analysis.

16 Cells were grown in RPMI 1640 medium supplemented with 20% fetal bovine serum (FBS) and  
17 100 U/mL penicillin-streptomycin. Cell lines used were routinely tested for Mycoplasma (Lonza,  
18 LT07-118) and were negative. SEM, NALM-6, and JeKo-1 cell lines were originally obtained  
19 from DSMZ cell bank. Modified cell lines were generated using lentivirus as described in the  
20 Method section “CAR-T Cell Production and Expansion.”

21

22 **Molecular Cloning and DNA Plasmids.** Genes encoding the various anti-CD72 nanobody  
23 sequences were synthesized as gene fragments from Twist Biosciences (South San Francisco,  
24 CA). DNA fragments were then cloned into a lentiviral expression vector with a Gibson  
25 assembly product (NEB, E2611S). DNA sequencing was performed to confirm accuracy of the  
26 vector. This final construct was then expressed in NEB 5-alpha Competent *E. coli* (High  
27 Efficiency) (NEB, C2987H). DNA was isolated using either QIAGEN Plasmid Plus Midi Kit or  
28 QiaPrep Spin Miniprep Kit (Qiagen, 27104).

29

30 **Humanization of the Framework Regions in the CD72 Nanobody.** Humanized derivatives of  
31 llama NbD4 were generated based on the human variable-heavy chain framework sequence of  
32 the clinically approved anti-Her2 antibody Trastuzumab (Herceptin). The thirteen residue  
33 positions that varied between llama and human V<sub>H</sub> framework were systematically exchanged  
34 with their human counterparts in different permutations, resulting in different NbD4 versions  
35 (NbD4-H1 through H24) that possess varying degrees of humanization. Llama residues Y37,

36 E44, and R45 in framework region 2 were retained as this region has been shown to be critical  
37 for the monomeric nature of nanobodies (marked in green in **Fig. 1A**). Humanized derivatives  
38 were then evaluated to resolve the optimal combination that humanizes NbD4 as much as  
39 possible, while retaining full CAR signaling efficacy.

40

41 **CAR Engineering.** Empty CAR, CD19, and NbD4 CAR expression plasmids utilized identical  
42 components aside from the variable extracellular binding domains (no binder for empty CAR,  
43 CD19-directed scFv with clone FMC63, or CD72 directed parental nanobody NbD4). The  
44 signaling components including the CD8 hinge and transmembrane domain, 4-1BB co-  
45 stimulatory domain, and CD3 $\zeta$  signaling domain are identical to those utilized in the clinically  
46 approved CD19-directed CAR construct tisagenlecleucel. H24 nanoCAR expression plasmid  
47 included the H24 anti-CD72 nanobody binder, an IgG4 hinge region mutated to avoid Fc  
48 receptor interaction (“EQ”) (24) a CD28 transmembrane domain, and a CD28 costimulatory  
49 domain. All humanized binders, including H1, H2, H3, H4, H5, H6, H7, H8, H9, H10, H11,  
50 H12, H13, H14, H15, H20, H23, as well as the affinity matured nanoCAR binders NbD4.1,  
51 NbD4.3, NbD4.7, and NbD4.13 all used identical CAR backbones to the H24 nanoCAR  
52 construct. Nanobody binders were cloned into the CAR backbone plasmid using Gibson  
53 Assembly protocol. CAR expression vectors utilized a green fluorescent protein (GFP) marker  
54 for identification of successfully transduced CAR<sup>+</sup> cells.

55

56 **Lentiviral Vector Production.** Lenti-X 293T cells were transfected with each CAR expression  
57 plasmid. Lenti-X 293T cells were cultured for 2-3 days, and then lentivirus was harvested and  
58 concentrated using Lenti-X Concentrator (Takara Bio, 631232). Primary human T cells were

59 transduced with lentivirus, and cells underwent spinfection for 120 minutes at 244 RCF to  
60 enhance transduction efficiency.

61

62 **CAR-T Cell Production and Expansion.** Primary human T cells were purified from either 1)  
63 the leukoreduction filter products of anonymous healthy blood donors from Vitalant (San  
64 Francisco, CA) under an institutional review board–exempt protocol in accordance with the U.S.  
65 Common Rule (Category 4) or 2) de-identified donor leukapheresis products obtained from  
66 StemCell Technologies. CD8<sup>+</sup> and CD4<sup>+</sup> T-cell populations were isolated separately using  
67 RosetteSep Human T Cell Enrichment Cocktails (Stemcell Technologies, 15023 and 15022) and  
68 EasySep Human CD4 T Cell Iso Kit (Stemcell Technologies, 17952) and EasySep Human CD8  
69 T Cell Iso Kit (Stemcell Technologies, 17953). CD4 and CD8 cells were thawed, cultured  
70 separately in media overnight, and then cells were counted the following day. CD4 and CD8 T  
71 cells were mixed in a 1:1 ratio. T cells were cultured in OpTmizer medium with CTS supplement  
72 (Thermo Scientific, A1048501) supplemented with 10% human AB serum (HP1022; Valley  
73 Medical), and penicillin/streptomycin (Fisher Scientific, 15-140-122) and were passaged every 2  
74 days. For expansion, T cells were stimulated with CD3/CD28 Dynabeads (11131-D; Thermo  
75 Fisher Scientific) according to the manufacturer’s instructions (20 µL of beads per 1 million T  
76 cells) for 5 days and grown in the presence of recombinant interleukin-7 (PeproTech, 200-07)  
77 and interleukin-15 (PeproTech, 200-15). Transduction with CAR lentivirus was performed 1 day  
78 after the start of bead stimulation. After the removal of CD3/CD28 activation beads, transduction  
79 efficiency was assessed by flow cytometry. CAR-T cells were labeled with intracellular GFP, so  
80 the percentage of GFP<sup>+</sup> cells determined the percentage of CAR-T cells generated. All CAR-T  
81 constructs included an extracellular Myc tag. To isolate a pure population of CAR-expressing T



82 cells, anti-Myc antibodies (Miltenyi Biotec, 130-124-877) were used for enrichment via MACS  
83 column (Miltenyi Biotec, 130-042-401). CAR-T cells were then eluted, cultured in OpTmizer  
84 medium with CTS supplement, and expanded for another 4 days. CAR-T cells were cultured in  
85 the presence of IL-7 (10 ng/mL) and IL-15 (10 ng/mL), and fresh cytokines were added every 2-  
86 3 days. Flow cytometry confirmed similar transduction across all CAR-T cell constructs.

87

88 **Murine Experiments.** All murine experiments were performed under authorization by the  
89 UCSF Institutional Animal Care and Use Committee (Approval Number: AN194778-01) and  
90 followed all applicable ethical and veterinary guidelines and regulations. NSG (NOD.Cg-  
91 *Prkdc<sup>scid</sup> Il2rg<sup>tm1Wjl</sup>/SzJ*, Jackson Laboratories) strain mice, bred in-house at the UCSF  
92 Laboratory Animal Research Center, were used for all experiments. A mixture of male and  
93 female NSG mice, 6 to 10 weeks old, were infused via tail-vein injection with one million B-  
94 ALL tumor cells including the SEM cell line, previously modified to stably express luciferase.  
95 For JeKo-1 studies, 5e5 effLuc-labeled tumor cells were similarly injected into mice. Tumor  
96 burden was quantified via non-invasive bioluminescence imaging (Perkin Elmer In Vivo  
97 Imaging System, Caliper Life Sciences) using whole body region of interest gating. Mice were  
98 distributed to different experimental arms such that each arm had equal initial tumor burden. One  
99 day after distribution, mice received either 1.5e6 or 3e6 CAR-T cells via tail-vein injection. All  
100 mouse experiments were conducted with 1:1 CD4:CD8 CAR-T cells. Symptomatic disease was  
101 deemed the survival endpoint.

102

103 **Affinity Maturation of anti-CD72 nanobodies based on Nbd4 sequence.** To improve the  
104 affinity of nanobody clone Nbd4, we expressed a site-saturation library of Nbd4 variants, fused  
105 to the Aga2 protein on the surface of yeast and performed selections for variants with increased  
106 affinity for CD72. We generated overlapping oligos that together recapitulated the entire Nbd4  
107 sequence, but that incorporate dNTP analogues in every residue position of all three CDR  
108 regions while leaving nanobody framework regions unmodified. Assembly of the library using  
109 overlap-extension PCR generated a variant library that at most generates one mutation per CDR  
110 at a time, resulting in a “soft” mutational variant library. Transformation into the EBY100 yeast  
111 strain using electroporation resulted in ~5e8 yeast transformants that were expanded for  
112 subsequent yeast display selections. We performed four equilibrium sorts with increasing  
113 stringency, starting at a 10nM concentrations of recombinant CD72 protein and ending at  
114 100pM, using a combination of MACS and FACS sorting to select higher affinity clones. In  
115 order to isolate the highest affinity clones with a low off-rate, we performed two additional  
116 selections using 6-hr and 10-hr off-rate sorts with stringent FACS gating on the top 1% of  
117 binders. Yeast clones were isolated and sequenced, revealing convergence of key amino acid  
118 substitutions including relaxation of I33 residue identity in CDR1 and increased aromaticity in  
119 CDR2 represented by either A50W, I51W, or A52F substitutions that together accounted for a  
120 significant increase in binding affinity.

121

122 **Expression of CD72 Fc-Fusion and Nanobody Fc-Fusion.** DNA encoding the CD72  
123 extracellular domain (amino acids 117–359) was polymerase chain reaction–amplified from a  
124 plasmid obtained from the Human ORFeome collection (hORFeome 8.1) and cloned into a  
125 mammalian expression vector, fused to the C-terminus of a human constant CH2–CH3 domain

126 (Fc domain), along with a N-terminal Avidity AviTag to facilitate site-specific biotinylation  
127 during expression. For expression, 30 µg of plasmid was transiently transfected into Expi293F  
128 cells (A14527, modified to stably express ER-localized BirA; Thermo Fisher Scientific) using  
129 polyethyleneimine (Transporter 5, 26008-5; Polysciences) at a 4:1 polyethyleneimine:DNA mass  
130 ratio. Cells were cultured in Expi293 Expression Medium (A1435101; Thermo Fisher)  
131 supplemented with 100 µmol/L biotin for 5 to 7 days to allow for protein expression and  
132 biotinylation. To purify recombinant protein, cells were pelleted and the supernatant that  
133 contained the protein was recovered, filtered, and pH adjusted with PBS (pH 7.4), prior to  
134 loading onto a HiTrap Protein A HP antibody purification column (29048576; Cytiva) to capture  
135 the CD72 Fc-fusion protein. The column was washed with PBS, and the protein was eluted with  
136 0.1-mol/L acetic acid, then buffer exchanged into PBS using an Amicon Ultra-4 10K device  
137 (10,000 MWCO; UFC503008; EMD Millipore). Non-biotinylated nanobody-Fc fusions were  
138 similarly purified after expression in unmodified Expi293 cells lacking BirA expression. The  
139 concentration of Fc-fusion protein was determined by A<sub>280</sub> by NanoDrop (Thermo), and  
140 molecular weight was confirmed by SDS-PAGE.

141

142 **CAR-T *In Vitro* Cytotoxicity Assays.** Cytotoxicity assays were conducted by mixing target  
143 cells with CAR-T cells for 24 hours using the indicated E:T ratios as described in each  
144 experiment. For measuring cytotoxicity by bioluminescence with target cell lines stably  
145 expressing effLuc, 150 µg/mL of d-luciferin (Gold Biotechnology, LUCK-1G) was added to  
146 each sample, incubated for 10 minutes at room temperature, and then read using a GloMax  
147 Explorer Plate Reader (Promega). Percent viable cells were normalized to the bioluminescence  
148 of tumor cells incubated with untransduced T cells at the corresponding E:T ratios or tumor cells

149 only. Experiments were performed with  $n = 3$  to 6 technical replicates. For tumor re-exposure  
150 experiments, CAR-T cells were plated with tumor cells stably expressing effLuc at the indicated  
151 E:T ratios in each figure. After 24 hours,  $1e5$  target cells were added to the remaining CAR-T  
152 cells every 24 hours for the indicated number of times in each experiment. Fresh media was  
153 added, without IL-7 and IL-15 supplementation, to every tumor rechallenge.

154

155 **Flow Cytometry.** Staining of the cells was performed with either  $1e5$  or  $5e5$  total cells per  
156 sample unless otherwise noted. The manufacturers' recommended amount of antibody was  
157 titrated, and an appropriate amount of antibody was used in 100  $\mu$ L total volume of fluorescence-  
158 activated cell sorting (FACS) buffer (PBS + 5% FBS) for 30 min prior to washing with excess  
159 FACS buffer. Samples were immediately analyzed using a CytoFLEX Flow Cytometer  
160 (Beckman Coulter). To determine the CAR-T cell memory/stem cell-like characteristics, FlowJo  
161 software was used to gate on GFP+ CAR-T cells. The following definitions were used for the  
162 various CAR-T immunophenotypes: naïve T cells (CD45RA+/CD62L+), central memory T cells  
163 (Tcm: CD45RA-/CD62L+), T-effector memory RA (TEMRA) cells (CD45RA+/CD62L-), and  
164 effector memory T cells (Tem: CD45RA-/CD62L-). Antibodies used for flow cytometry are  
165 listed in **Supplemental Table 1**.

166

167 **Quantitative Flow Cytometry.** The cell surface quantification of immunotherapy targets CD72  
168 and CD19 on tumor cells was used with Quantum™ APC MESF beads (Bangs Laboratories,  
169 823). When mice with JeKo-1 tumor were sacrificed, spleens were isolated, crushed, and gently  
170 filtered through a 100-micron filter. Red blood cell (RBC) lysis buffer (Fisher Scientific,

171 NC9067514) was used to remove residual RBCs. Residual tumor cells were then washed with  
172 FACS buffer (D-PBS + 5% FBS), and antibodies against CD19 and CD72 were added for flow  
173 cytometry analysis. Quantum™ APC MESF beads were also included to determine the number  
174 of CD19 or CD72 molecules per cell. These beads contain standard numbers of fluorophore  
175 molecules per bead to generate a standard curve, and then using the median fluorescence  
176 intensity (MFI) and inserting this number into an equation from Bangs Laboratories, the number  
177 of CD19 or CD72 molecules per cell was determined.

178

179 **Incucyte Live-Cell Killing Assays.** Healthy donor-derived CAR-T cells were generated against  
180 CD72, CD19, or had an empty CAR construct with no antigen binding domain. CAR-T cells  
181 were co-cultured against SEM or JeKo-1 cells at the following E:T ratios: 1:1, 1:3, and 1:10. 1e5  
182 tumor cells were used in each well, and the number of CAR-T cells varied depending on the E:T  
183 ratio in a flat-bottom clear 96-well plate. 200uL of OpTmizer media (same as above) was used  
184 per well. Loss of mCherry-positive tumor cells was used to determine cytotoxicity. Data were  
185 analyzed using the *Incucyte* Live-Cell Analysis system (Sartorius). Data were normalized using a  
186 cytotoxicity index, in which all data were normalized to the initial time point and plotted over  
187 time. Co-culture plates were incubated for 4-5 days in the Incucyte, and images were collected  
188 every four hours.

189

190 **CAR-T Cytokine Release Assays.** Various CAR-T constructs were cocultured with target cells  
191 at a 1:1 E:T ratio, and after 24 hours cells were centrifuged, supernatant was isolated and then  
192 snap frozen in liquid nitrogen. Cytokine samples were diluted 1:1 in RPMI + 20% FBS + 1%

193 pen/strep. Eve Technologies used Luminex xMAP technology for multiplexed quantification of  
194 14 human cytokines, chemokines, and growth factors. The multiplexing analysis was performed  
195 using the Luminex™ 200 system (Luminex, Austin, TX, USA) by Eve Technologies Corp.  
196 (Calgary, Alberta). Fourteen markers were simultaneously measured in the samples using Eve  
197 Technologies' Human High Sensitivity 14-Plex Discovery Assay® (MilliporeSigma, Burlington,  
198 Massachusetts, USA) according to the manufacturer's protocol. The 14-plex consisted of GM-  
199 CSF, IFN $\gamma$ , IL-1 $\beta$ , IL-2, IL-4, IL-5, IL-6, IL-8, IL-10, IL-12p70, IL-13, IL-17A, IL-23, TNF- $\alpha$ .  
200 Assay sensitivities of these markers range from 0.11 – 3.25 pg/mL for the 14-plex. Individual  
201 analyte sensitivity values are available in the MilliporeSigma MILLIPLEX® MAP protocol.

202

203 **Bulk RNA-sequencing.** CD8/CD4 CAR-T cells were generated as described above. Bulk RNA  
204 was isolated from CAR-T cells before tumor exposure, and after tumor exposure. For CAR-T  
205 cells (empty CAR, CD19, and H24) that were exposed to SEM tumor cells, a cytotoxicity assay  
206 was set up with a 1:1 E:T ratio. After 24 hours of exposure to SEM, CAR-T cells were isolated  
207 with MACS enrichment using anti-cMyc antibodies (Miltenyi Biotec, 130-092-113) to remove  
208 any residual SEM cells. The pure CAR-T cell population was centrifuged, and cell pellets were  
209 snap frozen in liquid nitrogen. CD8/CD4 CAR-T cells that were not exposed to SEM (pre-tumor  
210 CAR-T cells) were included as well for comparison. Triplicate samples for each condition  
211 (pretumor vs post-SEM exposure) for each CAR construct (empty CAR, CD19 CAR, and H24  
212 CAR) were included. RNA extraction, library preparation, and sequencing were performed at  
213 BGI. RNA QC was done with Agilent 2100 Bio analyzer and Agilent RNA 6000 Nano kit.  
214 Samples were sequenced using the DNB Seq platform from BGI. For genome mapping, clean

215 reads were mapped to reference genome (hg38) using HISAT. The average mapping ratio to the  
216 genome is 95.24% across samples. For gene expression analysis, clean reads were mapped to  
217 reference transcripts using Bowtie2 (ver 2.2.5) and expression levels calculated using RSEM  
218 (v1.2.8). Gene set enrichment analysis (GSEA) was performed using GSEA software version  
219 4.3.0 (Broad Institute).

220

221 **CD19 CAR-T relapsed B-ALL PDX establishment.** A patient derived xenograft sample from a  
222 pediatric patient with pre-B ALL was obtained from the pediatric Hematopoietic Tissue Cell  
223 Bank (HTCB) at UCSF. The primary peripheral blood sample was injected via the tail vein into  
224 an NSG mouse and passaged once. The HTCB study was approved by the Institutional Review  
225 Board at the University of California, San Francisco Benioff Children's Hospital and conducted  
226 in accordance with the Declaration of Helsinki.

227

228 **Ex vivo cytotoxicity versus PDX-derived tumor.** Patient derived xenograft (PDX) derived from  
229 B-ALL patient who relapsed after CD19 CAR-T cells, established from primary tumor collected  
230 under an IRB-approved protocol and in accordance with the Declaration of Helsinki. Flow  
231 cytometry was used to determine expression of CD19 and CD72. Tumor cells were cocultured  
232 with CAR-T cells at indicated E:T ratios for 24 hours in triplicate. Cytotoxicity was measured by  
233 staining for CD72-APC expression. Cytotoxicity at each E:T ratio was calculated with the  
234 equation:

235 % cytotoxicity = (1 - % APC positive tumor cells / average % APC positive tumor cells cultured  
236 with untransduced T cells at the corresponding E:T ratio) x 100%

237

238 **Ex vivo cytotoxicity versus primary B-ALL sample.** Primary adult B-ALL specimens were  
239 obtained under an IRB-approved protocol and in accordance with the Declaration of Helsinki.  
240 Primary B-ALL bone marrow and peripheral blood samples were assessed for CD19, CD22,  
241 CD10, CD34 and CD72 expression. Tumor and CAR-T cells were cocultured for 24 hours at the  
242 indicated E:T ratios in triplicate. Cells were stained for CD72 and CD3 to determine cytotoxicity.  
243 The values were normalized to untransduced cells incubated with tumor. Cytotoxicity at each  
244 E:T ratio was calculated with the equation:

245

246 % cytotoxicity = (1 - % CD3 negative tumor cells / average % CD3 negative tumor cells cultured  
247 with untransduced T cells at given effector to tumor ratio) \* 100%

248

249 **Biolayer Interferometry.** Bio-layer interferometry data (BLI) was obtained using an Octet  
250 RED384 (ForteBio) instrument. Biotinylated CD72 protein was loaded onto a streptavidin  
251 biosensor until 0.2-nm signal was achieved. After blocking with 10 uM biotin, each of the  
252 nanobody binders was added to determine binding affinity. PBSTB was used a buffer for all  
253 analytes. Data were analyzed using the ForteBio Octet analysis software and kinetic parameters  
254 determined with a 1:1 monovalent binding model.

255



256 **Retrogenix binder specificity studies.** The Retrogenix Cell Microarray Technology uses  
257 HEK293 transiently transfected to overexpress 6,019 secreted and membrane-tethered proteins.  
258 Each construct encoding a plasma membrane protein open reading frame also includes zsGreen  
259 as a positive control for transfection. Initial binder specificity screens for nanobody test article  
260 “H24-Fc fusion” demonstrated consistent binding to CD72-expressing HEK293 cells. Full  
261 microarray library screens ( $n = 2$ ) were performed on fixed HEK293 cells with this test article at  
262 a concentration of 10 ug/mL. Live cell confirmation screens ( $n = 1$ ) were performed with  
263 comparison to rituximab (1 ug/mL) and no antibody as controls for background and false  
264 positive hits. Flow cytometry (gated on zsGreen+, live cells) was used to assess binding to final  
265 potential hits of CD72 and CBLIF, with CD20 as control. Standard Retrogenix thresholds of  
266 fold-change over background are used to assess true- vs. false-positive binding. Retrogenix  
267 determined CD72 as the only specific binding partner of H24-Fc fusion, whereas CBLIF binding  
268 was determined to be non-significant and consistent with background noise.

269

270 **Statistical Analysis.** All statistical analyses were performed in GraphPad Prism version 9. Data  
271 are presented as mean +/- standard deviation, unless otherwise specified. Statistically significant  
272 differences are included in each figure and/or figure legend. All  $n$  values given are biological  
273 replicates, unless otherwise specified. A  $p < 0.05$  was considered statistically significant and  $p$ -  
274 values were denoted with asterisks as follows ( $ns = p > 0.05$ ,  $* = p < 0.05$ ,  $** = p < 0.01$ ,  $*** = p$   
275  $< 0.001$ ,  $**** = p < 0.0001$ ). The number of repeats performed, and the statistical tests used, are  
276 described in the relevant figure legend.

277

278 **Data availability.** RNA-seq data is publicly deposited to the Gene Expression Omnibus (GEO)  
279 repository with accession number: GSE218791.  
280  
281

**SUPPLEMENTAL FIGURE 1**

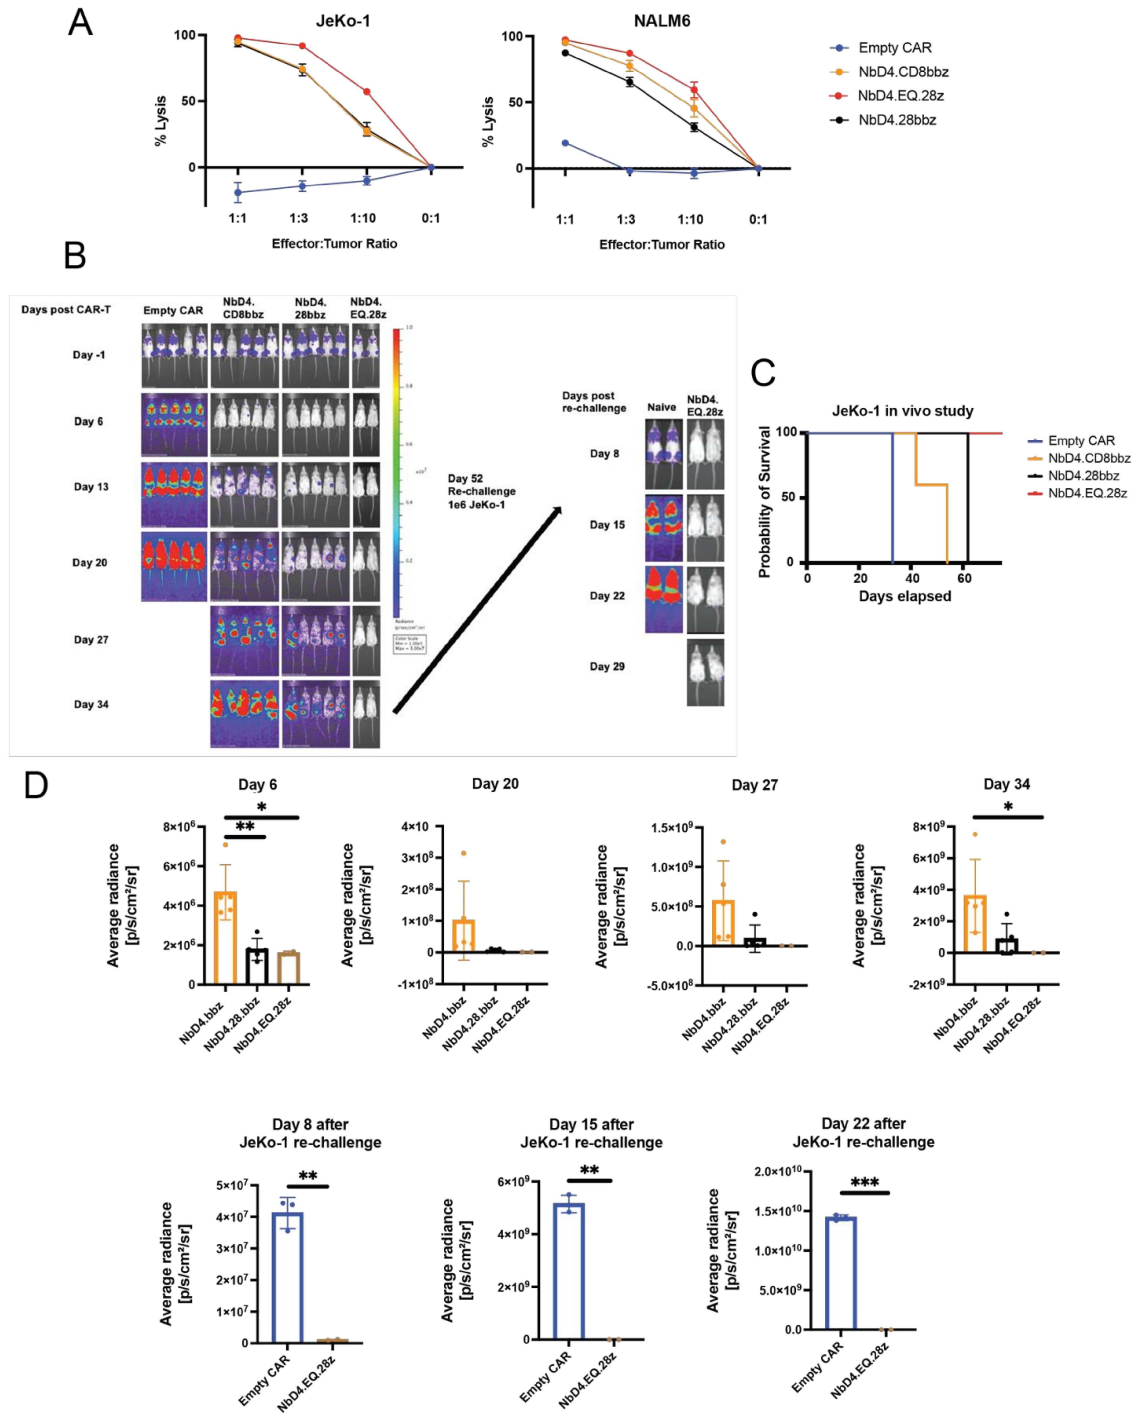

283 **Supplemental Figure 1. NbD4.EQ.28z nanoCARs have potent *in vivo* and *in vitro* anti-**  
284 **lymphoma efficacy compared to other CAR backbones. A.** *In vitro* cytotoxicity of NbD4  
285 nanoCARs with various CAR backbones were tested against a B-ALL cell line (NALM6) and a  
286 mantle cell lymphoma cell line (JeKo-1) at the indicated effector:tumor ratios, cocultured for 24  
287 hours. Cell viability was measured via bioluminescence. Data was generated from three  
288 biological replicates. Error bars were made using the standard error of the mean, and data were  
289 normalized to the tumor only (E:T 0:1) condition. **B.** NSG mice were injected with 1e6 Jeko cells  
290 on day -4, and on day 0 mice were treated with 4e6 NbD4 CD72 nanoCARs with the various  
291 CAR backbones ( $n=5$  mice per arm for Empty CAR, NbD4.CD8bbz, and NbD4.28bbz;  $n=2$  mice  
292 for NbD4.EQ.28z arm). Due to CAR-T manufacturing challenges with the NbD4.EQ.28z  
293 construct for this specific study, there were only sufficient CAR-T cells to include two mice in  
294 this treatment arm. BLI was performed on day -1 to randomize the mice into different treatment  
295 arms to ensure the disease burden was equal across all CAR constructs. JeKo-1 cells express  
296 luciferase, and tumor burden was determined using bioluminescent imaging (BLI). At day 52,  
297 mice treated with NbD4.EQ.28z nanoCARs, or naïve mice that were not treated ( $n=2$  mice per  
298 condition), were re-challenged with 1e6 JeKo-1 cells, and disease burden was followed based on  
299 weekly BLI. **C.** Kaplan-Meier survival curves are shown for each of the tested nanoCAR  
300 constructs. **D.** Tumor burden was assessed weekly via BLI, quantified BLI images on each day  
301 after CAR-T injection are shown. Bar graphs represent the mean  $\pm$  S.D. Data in **Supplemental**  
302 **Fig. 1C** generated using the long-rank (Mantel-Cox) test. Data in **Supplemental Fig. 1D**  
303 generated using an unpaired two-tailed *t*-test. ns =  $p > 0.05$ , \* =  $p < 0.05$ , \*\* =  $p < 0.01$ , \*\*\* =  $p$   
304  $< 0.001$   
305

## SUPPLEMENTAL FIGURE 2

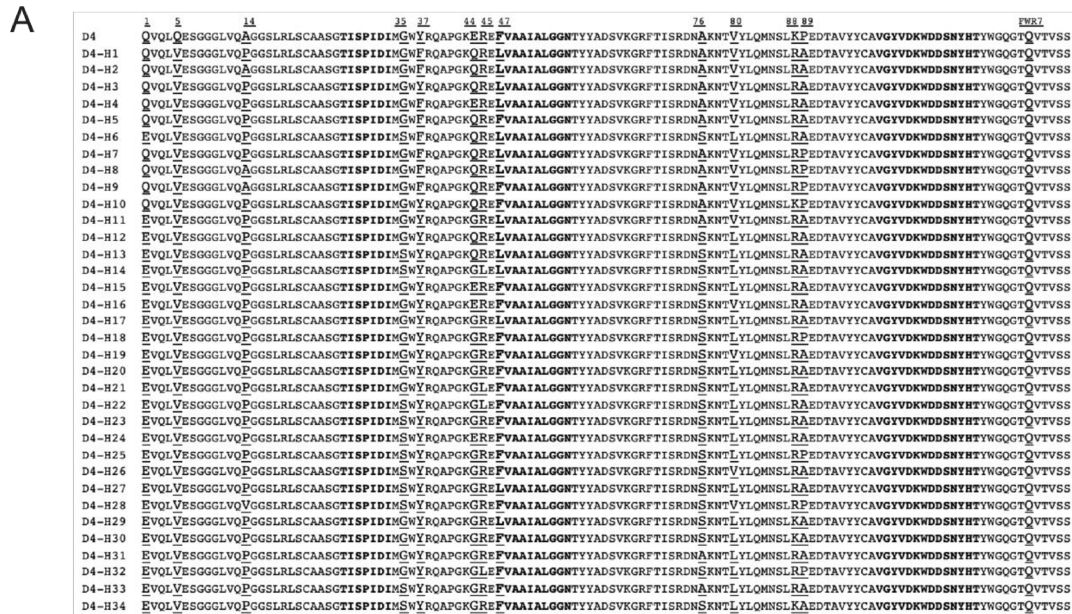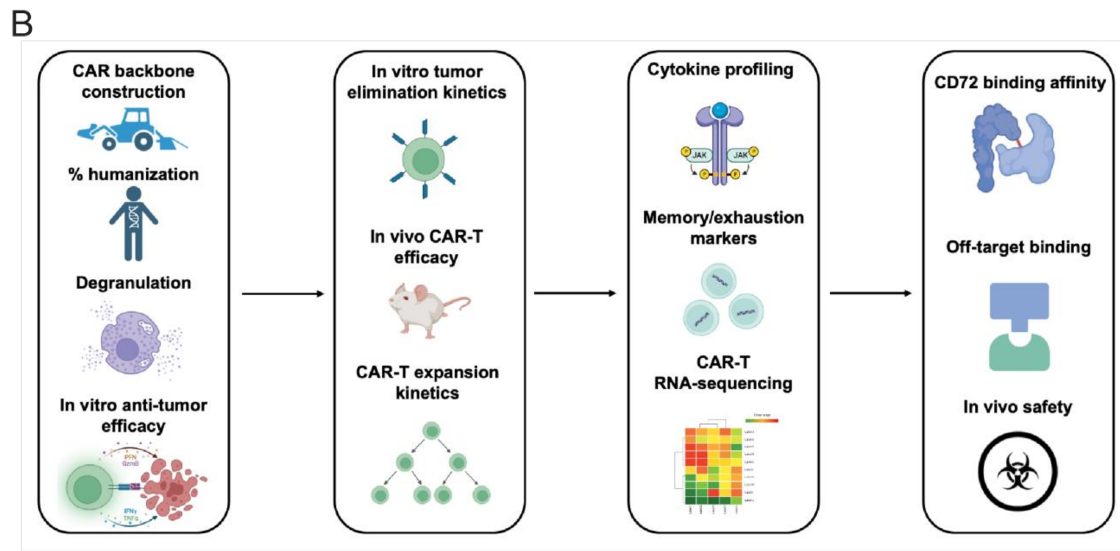

306

307 **Supplemental Figure 2. Framework humanization of Nbd4 and schematic for evaluating**  
 308 **humanized nanoCARs.** **A.** Humanization strategy to induce mutations in certain regions of the  
 309 framework region in the Nbd4 construct. Amino acid sequence alignments are shown,  
 310 comparing parental Nbd4 (D4) to 34 humanized Nbd4 constructs. Amino acid substitutions  
 311 were made in the framework regions (specific sites of mutations underlined), while the

312 complementarity determining regions (CDRs; in bold) were left unchanged. “Human”  
313 comparator V<sub>H</sub> sequence is derived from the fully human IgG4 monoclonal antibody  
314 trastuzumab. **B.** Rationale and characterization of humanized anti-CD72 nanobody CAR-T cells.  
315 Figure made with BioRender.  
316

### SUPPLEMENTAL FIGURE 3

**A**

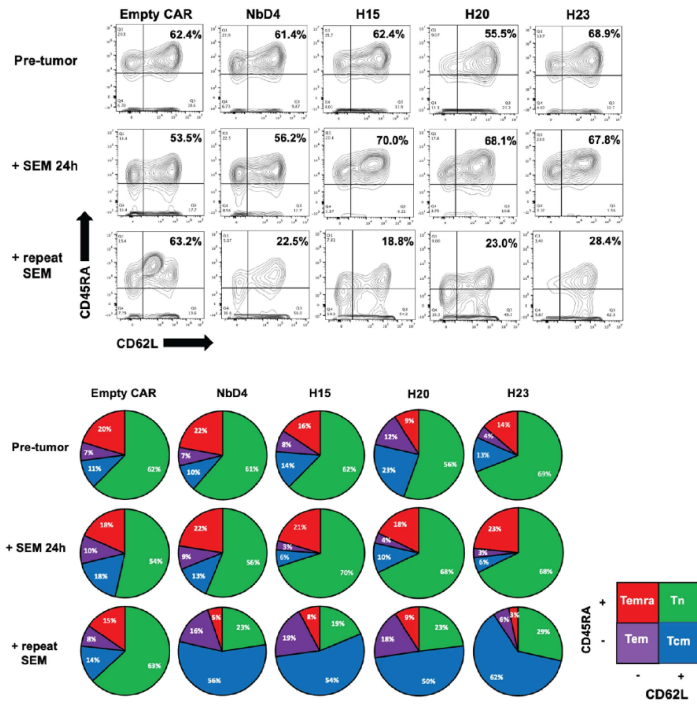

**B**

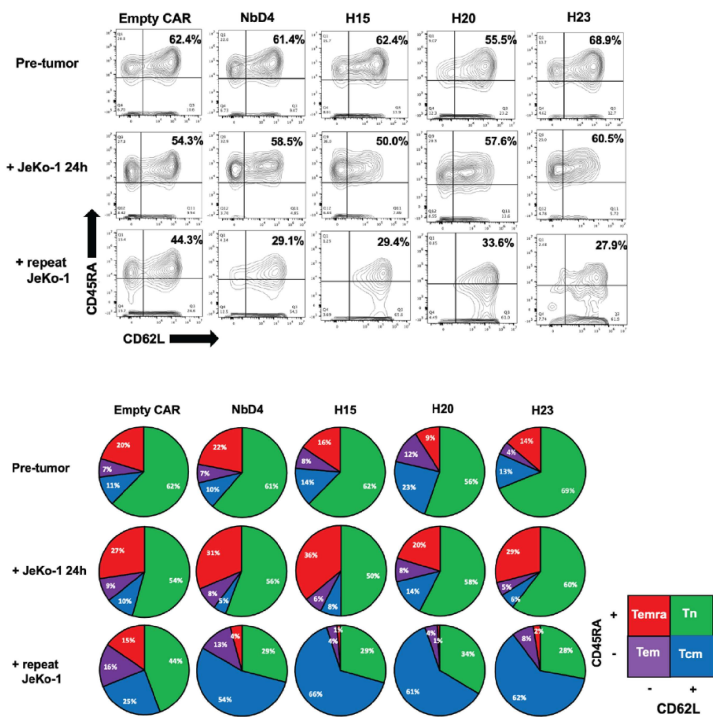



318 **Supplemental Figure 3. Memory marker expression on various CD72 nanoCAR constructs**  
319 **decreases with repeated tumor exposure to SEM and JeKo-1. A.** Various CD72 nanoCARs  
320 and empty CAR-T cells were generated, and flow cytometry was performed to determine cell  
321 surface expression of CD45RA and CD62L pre-tumor exposure. Each of the CAR-T cell  
322 constructs were then co-cultured with SEM tumors at a 1:1 effector:tumor (E:T) ratio (1e5 SEM  
323 cells) for 24 hours, followed by flow cytometry for CD45RA and CD62L. A second exposure  
324 with 1e5 SEM tumor cells was added, and 48 hours later flow was performed for CD45RA and  
325 CD62L. Circle plots are shown indicating naïve T cells (CD45RA+/CD62L+), central memory T  
326 cells (CD45RA-/CD62L+), T effector memory cells re-expressing CD45RA  
327 (CD45RA+/CD62L-), and effector memory T cells (CD45RA-/CD62L-). *N* = 1 replicate. **B.**  
328 Various CD72 nanoCARs and empty CAR-T cells were generated, and flow cytometry was  
329 performed to determine cell surface expression of CD45RA and CD62L pre-tumor exposure.  
330 Each of the CAR-T cell constructs were then co-cultured with JeKo-1 tumors at a 1:1  
331 effector:tumor (E:T) ratio (1e5 JeKo-1 cells) for 24 hours, and flow cytometry was done for  
332 CD45RA and CD62L. A second exposure with 1e5 JeKo-1 tumor cells was added, and 48 hours  
333 later flow was done for CD45RA and CD62L. Circle plots are shown indicating naïve T cells  
334 (CD45RA+/CD62L+), central memory T cells (CD45RA-/CD62L+), T effector memory cells re-  
335 expressing CD45RA (CD45RA+/CD62L-), and effector memory T cells (CD45RA-/CD62L-). *n*  
336 = 1 replicate.  
337



**SUPPLEMENTAL FIGURE 4**

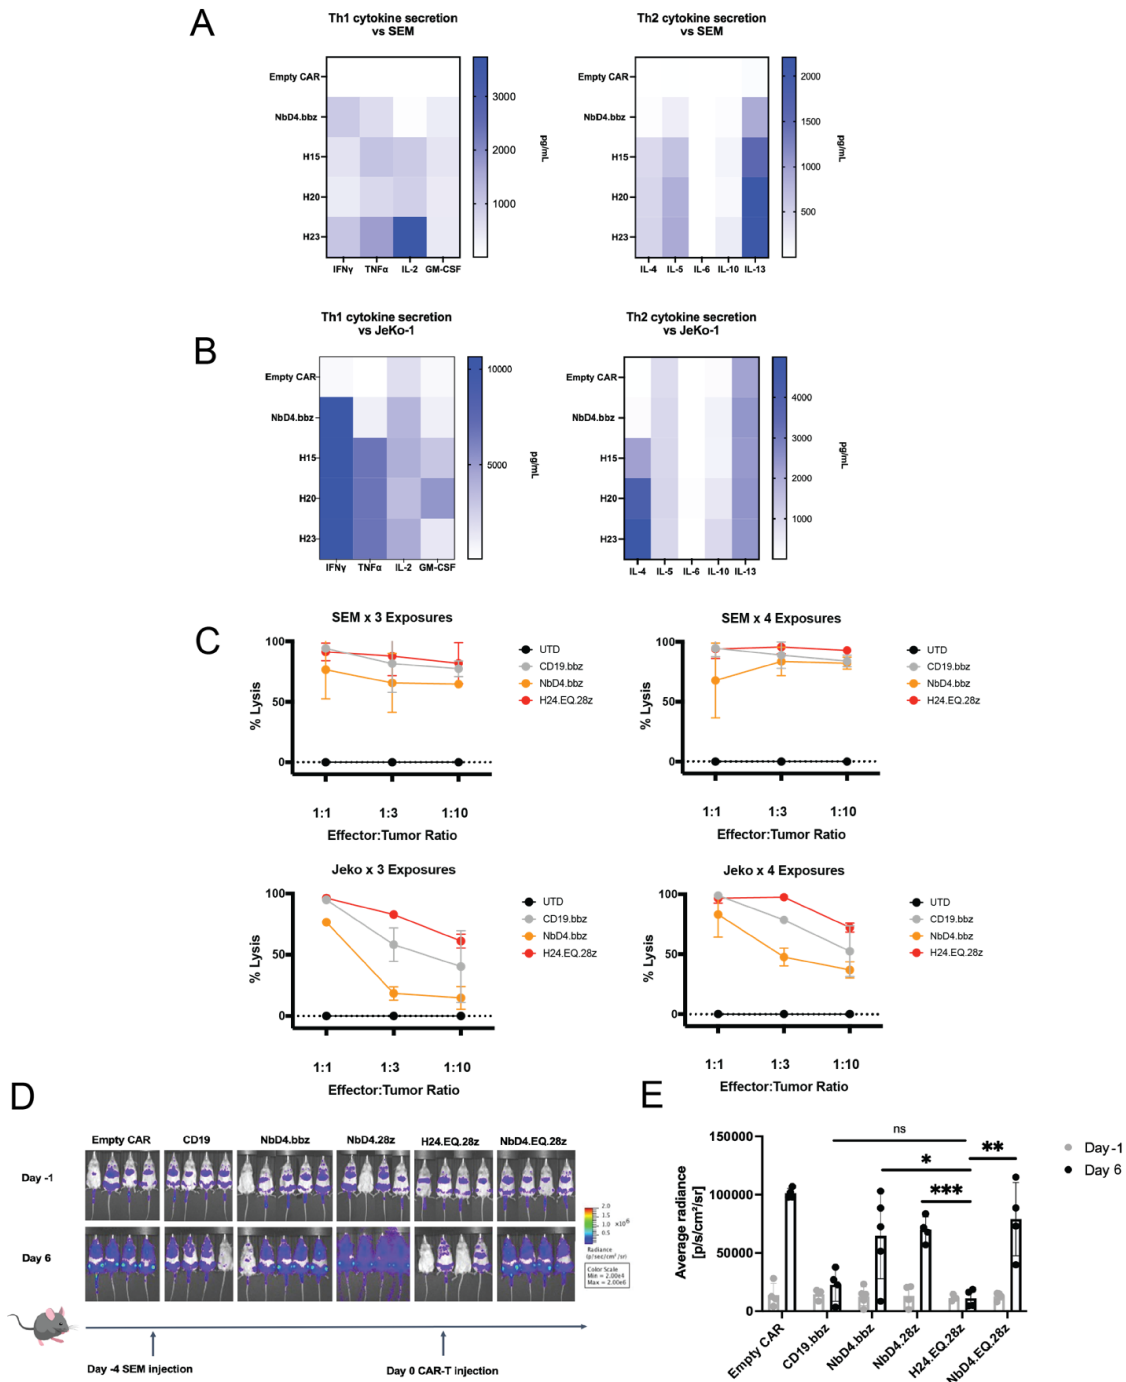

338

339 **Supplemental Figure 4. Humanized CD72 nanoCARs have a unique cytokine secretion**  
 340 **profile and retain potent anti-tumor efficacy upon multiple tumor exposures. A. CAR-T**

341 cells were co-cultured with SEM tumor cells at a 1:1 E:T ratio for 24 hours. Multiplexed  
342 cytokine profiling from culture supernatant after 24-hour SEM exposure. Heatmaps were  
343 generated for Th1 or Th2-type cytokine secretion.  $n = 1$  replicate. **B.** CAR-T cells were co-  
344 cultured with JeKo-1 tumor cells at a 1:1 E:T ratio for 24 hours. Multiplexed cytokine profiling  
345 from culture supernatant after 24-hour JeKo-1 exposure. Th1 and Th2 cytokine profiles are  
346 shown in the heatmaps.  $n = 1$  replicate. **C.** *In vitro* 24-hour cytotoxicity assays comparing H24,  
347 NbD4, and CD19 CAR-T cells against SEM or JeKo-1. Every 24 hours,  $1e5$  SEM or  $1e5$  JeKo-1  
348 tumor cells were added to each CAR-T cell construct. The third and fourth SEM or JeKo-1  
349 tumor exposures are shown. Data are normalized to untransduced T cells (UTD).  $n = 3$  biological  
350 replicates. **D.** NSG mice were injected with  $1e6$  firefly-luciferase labeled SEM B-ALL cells on  
351 day -4, and on day 0 mice were treated with a low-dose *in vivo* CAR stress test with  $1.5e6$  CAR-  
352 T cells per mouse (1:2 to 1:4 ratio of CD8/CD4 CAR-T cells). BLI was performed on day -1 to  
353 randomize the mice into different treatment arms to ensure the disease burden was equal across  
354 all CAR constructs. **E.** Tumor burden was assessed on day -1 and day 6 by BLI, and quantified  
355 BLI images are shown. The data from all mice are averaged, and error bars represent standard  
356 deviation. Data **Fig. 3E** generated using an unpaired two-tailed t-test. ns =  $p > 0.05$ , \* =  $p < 0.05$ ,  
357 \*\* =  $p < 0.01$ , \*\*\* =  $p < 0.001$   
358



360 **Supplemental Figure 5. H24 nanoCARs have similar in vitro and in vivo proliferation to**  
361 **CD19 CAR-T cells. A.** Empty CAR, H24 nanoCARs, and CD19 CAR-T cells were co-cultured  
362 with SEM tumor cells at 1:10 E:T ratio for 120 hours; data obtained using Incucyte live-cell  
363 imaging ( $n = 6$  technical replicates). **B.** Empty CAR, H24 nanoCARs, and CD19 CAR-T cells  
364 were co-cultured with JeKo-1 tumor cells at 1:10 E:T ratio for 120 hours; data obtained using  
365 Incucyte live-cell imaging ( $n = 6$  technical replicates). **C.** NSG mice were injected with  $1e6$   
366 luciferase-labeled SEM B-ALL cells on day -4, and on day 0 mice were treated with  $2.5e6$  CAR-  
367 T cells per mouse.  $n = 3-6$  mice per arm. Peripheral blood was sampled from mice on day 17 and  
368 day 28. CAR-T cells were determined based on dual positivity for GFP+ and CD3. Bar graphs  
369 represent the mean  $\pm$  S.D. Data in **Supplemental Fig. 9C** were generated using an unpaired  
370 two-tailed  $t$ -test. ns =  $p > 0.05$ , \* =  $p < 0.05$ .

371

372

373

374

375

376

377

378

379

380

381

382

### SUPPLEMENTAL FIGURE 6

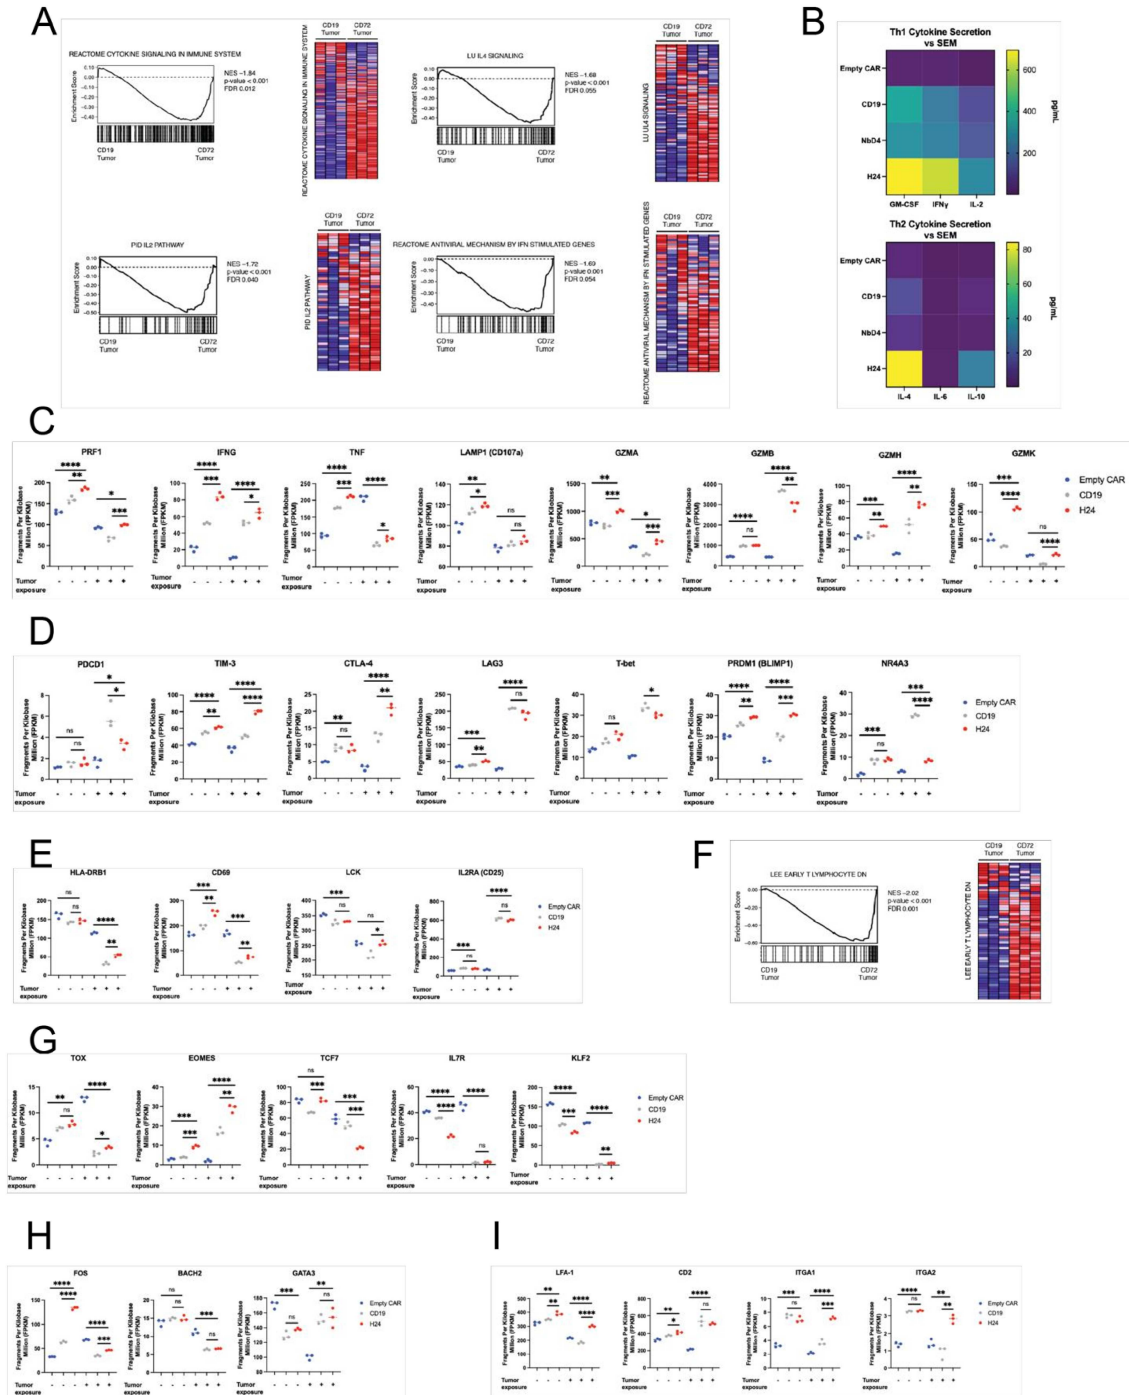

383

384

385 **Supplemental Figure 6. RNA-seq reveals that H24 nanoCARs activate unique**  
386 **transcriptional pathways, compared to CD19 CAR-T cells, before and after exposure to**  
387 **SEM tumors. A.** Gene set enrichment analysis (GSEA) plots and heatmaps showing different  
388 transcriptional pathways involved in cytokine signaling that are upregulated in H24 nanoCARs  
389 compared to CD19 CAR-T cells, after exposure to SEM for 24 hours. FDR = false discovery  
390 rate. **B.** Empty CAR, CD19, NbD4, and H24 CAR-T cells were co-cultured with SEM tumors for  
391 24 hours. Multiplexed cytokine profiling from culture supernatant after 24-hour SEM exposure.  
392 Heatmaps were generated for Th1 or Th2-type cytokine secretion. Experiment performed in  
393 biological triplicate. **C.** Expression of selected cytokines and genes involved in cytotoxicity,  
394 before and after exposure to SEM. **D.** Expression of selected inhibitory receptors, before and  
395 after exposure to SEM. **E.** Expression of selected genes involved in T cell activation, before and  
396 after exposure to SEM. **F.** GSEA plot and heatmap showing a transcriptional pathway involved  
397 in early T cell differentiation, after exposure to SEM for 24 hours. **G.** Expression of selected  
398 genes involved in stem-like CAR-T cell characteristics, before and after exposure to SEM. **H.**  
399 Expression of genes shown to be upregulated in patients with long CAR-T cell persistence  
400 greater than six months, before and after exposure to SEM. **I.** Expression of genes important for  
401 cell-cell adhesion that are involved in CAR-T elimination of tumor cells, before and after  
402 exposure to SEM. Data in **Supplemental Fig. 5C-E; Supplemental Fig. 5G-I** were generated  
403 using an unpaired two-tailed t-test. ns =  $p > 0.05$ , \* =  $p < 0.05$ , \*\* =  $p < 0.01$ , \*\*\* =  $p < 0.001$ ,  
404 \*\*\*\* =  $p < 0.0001$   
405

### SUPPLEMENTAL FIGURE 7

**A**

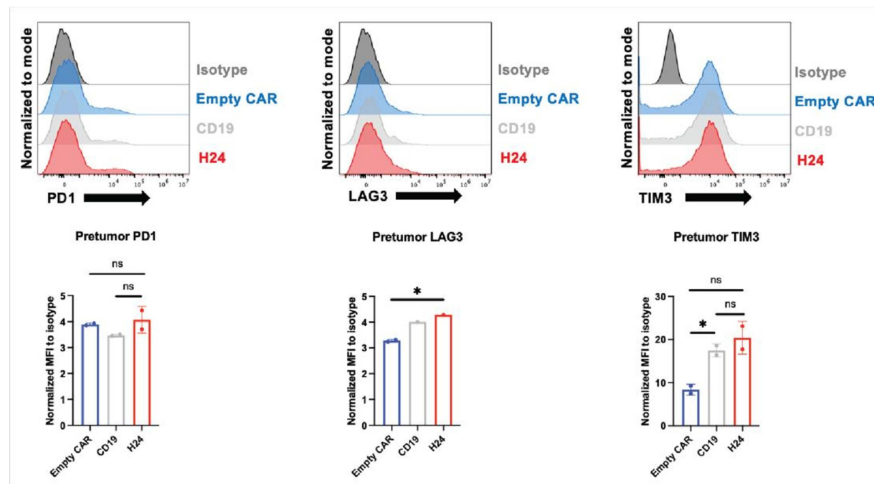

**B**

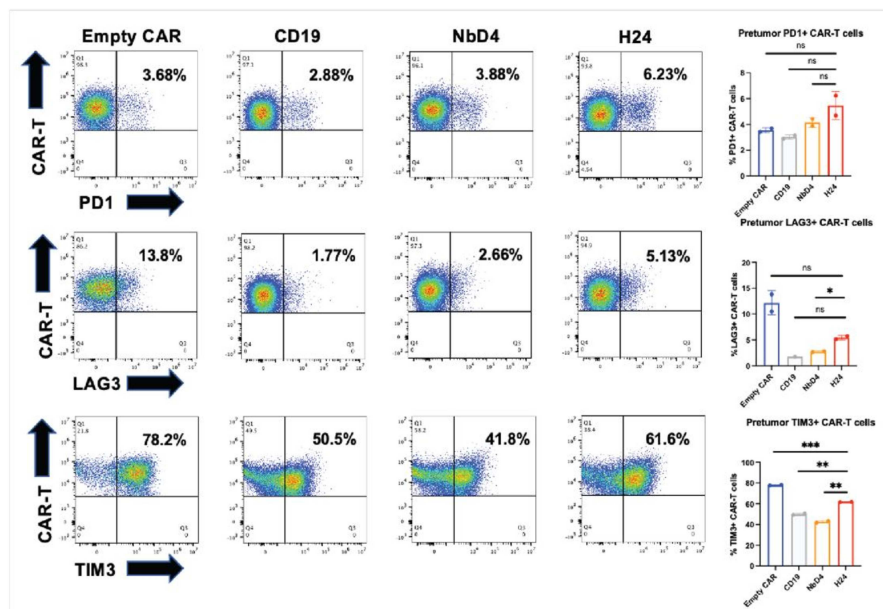

**C**

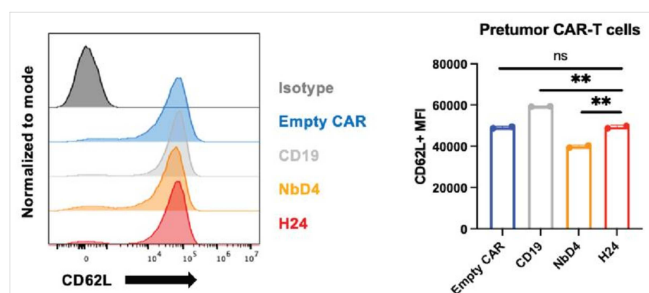

407 **Supplemental Figure 7. Pretumor exhaustion marker profiling reveals that H24 nanoCARs**  
408 **have similar expression compared to other CAR-T constructs. A.** H24, CD19, and empty  
409 CAR-T cells were tested for baseline levels of the exhaustion markers PD1, LAG3, and TIM3 by  
410 flow cytometry. The mean fluorescence intensity (MFI) was normalized to each isotype control,  
411 and bar graphs are shown for each exhaustion marker. Experiment performed in duplicate. Bar  
412 graphs represent the mean +/- S.D. **B.** H24, NbD4, CD19, and empty CAR-T cells were tested  
413 for baseline levels of the exhaustion markers PD1, LAG3, and TIM3 by flow cytometry, using a  
414 different T cell donor compared to **Supplemental Fig. 6A**. Expression of CAR-T cells that are  
415 positive for each exhaustion marker is listed in the upper right quadrant. Experiment performed  
416 in duplicate. Bar graphs represent the mean +/- S.D. **C.** H24, NbD4, CD19, and empty CAR-T  
417 cells were tested for baseline levels of the memory marker CD62L by flow cytometry. Bar  
418 graphs represent the mean +/- S.D. Data in **Supplemental Fig. 6A-C** were generated using an  
419 unpaired two-tailed t-test. ns =  $p > 0.05$ , \* =  $p < 0.05$ , \*\* =  $p < 0.01$ , \*\*\* =  $p < 0.001$   
420



421

**SUPPLEMENTAL FIGURE 8**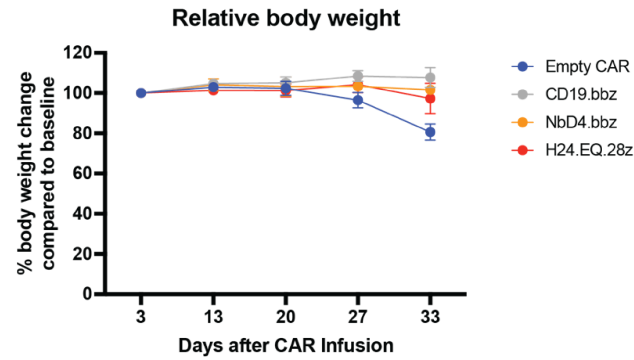

422

423 **Supplemental Figure 8. Relative mouse body weight over the course of the *in vivo***  
424 **lymphoma study in Figure 5.** NSG mice were injected with  $5 \times 10^5$  firefly-luciferase labeled JeKo-  
425 1 mantle cell lymphoma cells on day -4, and on day 0 mice were treated with  $3 \times 10^6$  CAR-T cells  
426 per mouse ( $n = 5/\text{arm}$ , as shown). During the study, mice weights were obtained once per week.  
427 Mouse weights were normalized to the initial weight that was obtained on day 3.

### SUPPLEMENTAL FIGURE 9

**A**

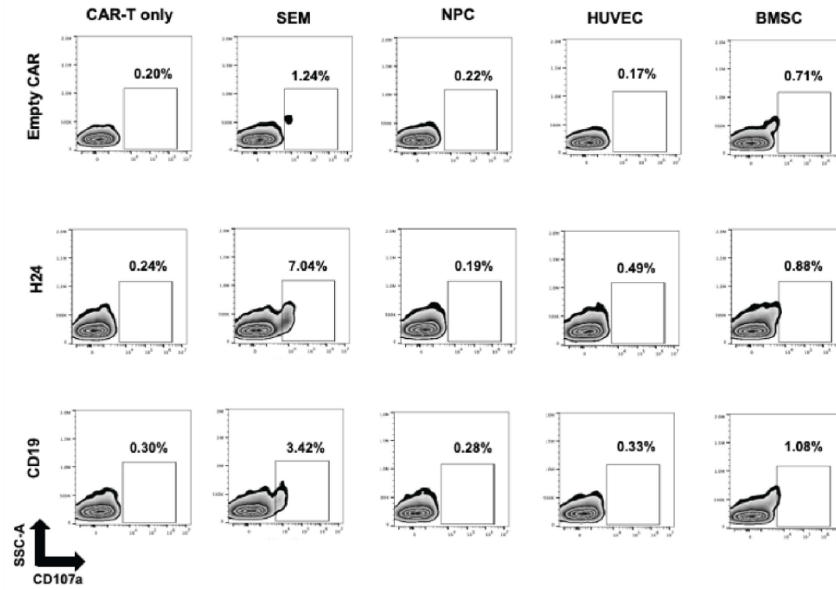

**B**

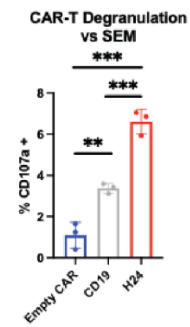

**C**

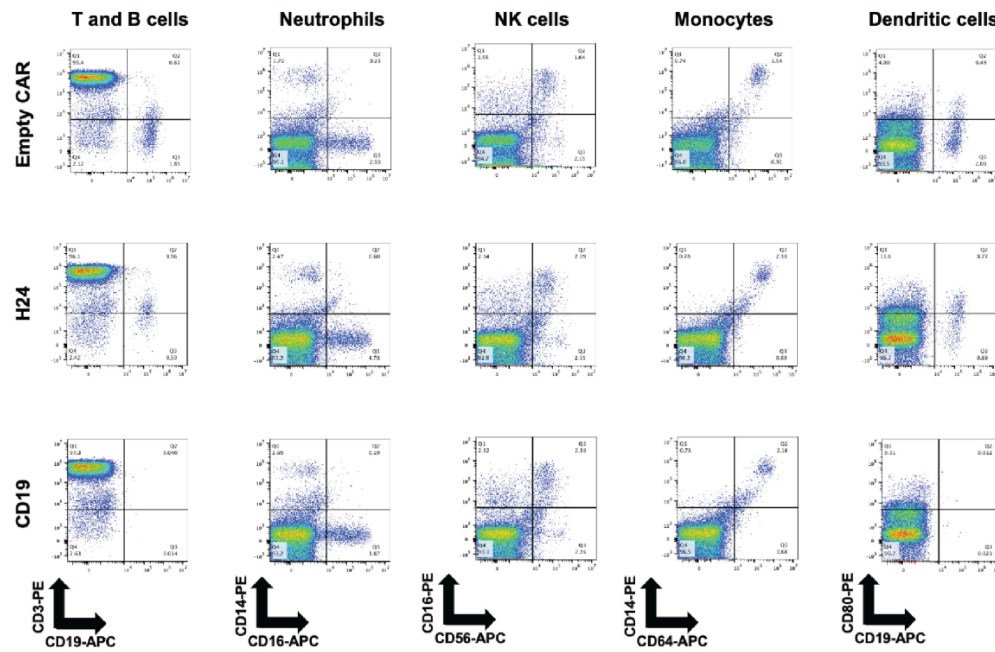

428

30

429 **Supplemental Figure 9. H24 nanoCARs have a reassuring toxicity profile against normal**  
430 **human tissues. A.** *In vitro* flow cytometry-based assay to determine CAR-T degranulation  
431 against different target cells using CD107a. H24, CD19, and empty CAR-T cells were generated  
432 and co-cultured at a 2:1 E:T ratio against the indicated cell types for six hours. SEM = *KMT2Ar*  
433 B-ALL cell line ( $n = 3$  technical replicates); NPC = neuronal progenitor cells ( $n = 3$  technical  
434 replicates); HUVECS = human umbilical vein endothelial cells ( $n = 1$ ); BMSC = bone marrow  
435 stromal cells ( $n = 1$ ). Percentage of CAR degranulation is displayed. Bar graph shows CD107a  
436 expression against the CD19+/CD72+ SEM cell line. Bar graphs represent the mean +/- S.D. **B.**  
437 Flow cytometric analysis of normal donor peripheral blood mononuclear cells (PBMCs) after 24-  
438 hour co-culture with either H24, CD19, or empty CAR-T cells. Flow plots display lack of cell  
439 ablation for T-cells, neutrophils, NK cells, monocytes, and dendritic cells. B-cells were fully  
440 eradicated by CD19 CAR-T cells while partly eradicated by H24 nanoCARs. Experiment  
441 performed in duplicate. Data in **Supplemental Fig. 7B** were generated using an unpaired two-  
442 tailed t-test. \*\* =  $p < 0.01$ , \*\*\* =  $p < 0.001$   
443

## SUPPLEMENTAL FIGURE 10

A

## Affinity Maturation Selection Schematic

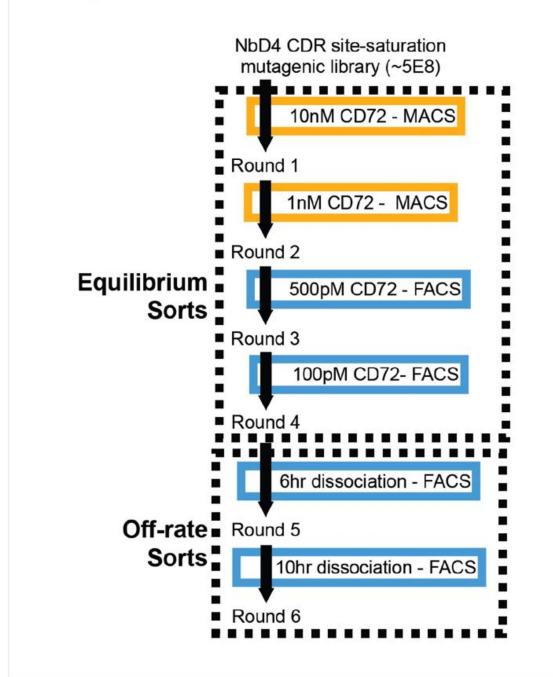

B

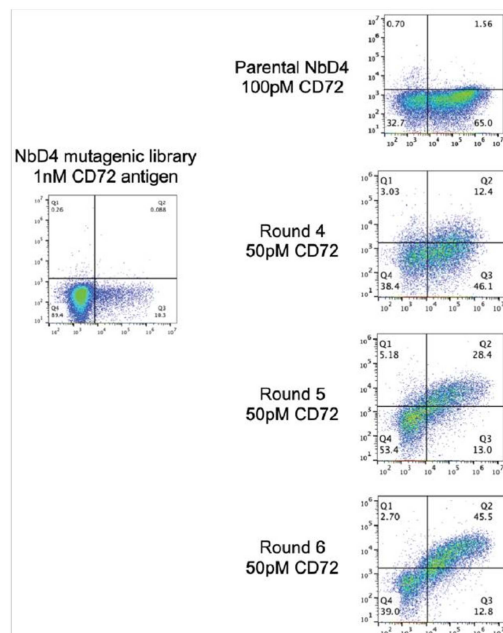

445 **Supplemental Figure 10. Affinity maturation of CD72 nanobody binders. A.** Affinity  
446 maturation selection schematic. **B.** Six total rounds of MACS and FACS selections were  
447 performed with a CDR site saturated NbD4 yeast display library to isolate variants with  
448 increased binding affinity for CD72. Four equilibrium sorts of increasing stringency were  
449 performed, followed by two high-stringency kinetic off-rate sorts of 6-hrs and 10-hrs with FACS  
450 gating on the top 1% of binding clones. *y*-axis of flow cytometry plots represents FITC-  
451 conjugated recombinant CD72 bound to yeast; *x*-axis represents HA staining of yeast  
452 successfully expressing a surface nanobody.

453

| <b>Antibody, clone</b>              | <b>Manufacturer</b> | <b>Catalog number</b> |
|-------------------------------------|---------------------|-----------------------|
| Human CD72-APC (Clone 3F3)          | Biolegend           | 316210                |
| Human CD19-APC (Clone HIB19)        | BD<br>Biosciences   | 555415                |
| Human CD19-PE (Clone HIB19)         | Biolegend           | 302208                |
| Human CD3-APC (Clone SK7)           | Biolegend           | 344812                |
| Human CD3-PE (Clone UCHT1)          | Biolegend           | 300456                |
| Human CD22-FITC (Clone HIB22)       | Biolegend           | 302504                |
| Human CD34 Pacific Blue (Clone 581) | Biolegend           | 343512                |
| Human CD10 (Clone HI10a)            | Biolegend           | 312230                |
| Human CD107a-APC (Clone H4A3)       | BD<br>Biosciences   | 560664                |
| Human CD45RA-PE (Clone HI100)       | Invitrogen          | 12-0458-42            |
| Human CD62L-APC (Clone DREG-56)     | BD<br>Biosciences   | 559772                |
| Human PD1-APC (Clone EH12.2H7)      | Biolegend           | 329908                |
| Human LAG3-APC (Clone 3DS223H)      | Invitrogen          | 17-2239-41            |
| Human TIM3-APC (Clone F38-2E2)      | Invitrogen          | 17-3109-42            |
| Alexa Fluor 647 Streptavidin        | Biolegend           | 405237                |
| Human CD16-APC (Clone 3G8)          | Biolegend           | 302011                |

34

|                             |           |        |
|-----------------------------|-----------|--------|
| Human CD14-PE (Clone 63D3)  | Biolegend | 367103 |
| Human CD64-APC (Clone 10.1) | Biolegend | 305013 |
| Human CD80-PE (Clone 2D10)  | Biolegend | 305208 |

454

455 **Supplemental Table 1. List of all antibodies used for flow cytometry.**

456 B-ALL pediatric patient derived xenograft:

| <b>PDX name</b> | <b>Mutation</b>                                                                                       | <b>Treatment status</b>              | <b>Cytogenetics</b>         | <b>Age</b>                              | <b>Sex</b> |
|-----------------|-------------------------------------------------------------------------------------------------------|--------------------------------------|-----------------------------|-----------------------------------------|------------|
| HM5566          | <i>TP53</i> p.R280T,<br><i>MYC</i> amplification,<br><i>CDKN2A</i> and<br><i>CDKN2B</i> deep deletion | Relapse after<br>CD19 CAR-T<br>cells | ETV6-RUNX1<br>rearrangement | Patient is<br>less than 10<br>years old | female     |

457

458

459 B-ALL adult primary patient samples:

| <b>Sample name</b> | <b>Mutation</b>                                | <b>Cytogenetics</b>                                                                                                                   | <b>Treatment Status</b>               | <b>Sex</b> |
|--------------------|------------------------------------------------|---------------------------------------------------------------------------------------------------------------------------------------|---------------------------------------|------------|
| HMTB0<br>0911      | <i>CDKN2A</i><br>and<br><i>CDKN2B</i><br>loss  | 45-46,X,-<br>X,add(5)(q11.2),del(5)(q22q33),<br>del(9)(p13),add(11)(q23),<br>?del(16)(q22)[11]/46,XX[17].nu<br>c ish(ABL1,BCR)x2[173] | Relapse after<br>CD19 CAR-<br>T cells | female     |
| HMTB0<br>0716      | <i>KMT2A</i> r,<br><i>MYC</i><br>rearrangement | 46XX                                                                                                                                  | Relapse after<br>CD19 CAR-<br>T cells | female     |



460

461 **Supplemental Table 2.** Patient characteristics of the patient derived xenograft (PDX) and the  
462 two primary patient samples that were used in **Fig. 3D-I.**

463

464

## SUPPLEMENTAL TABLE 3

| Organ System        | Empty CAR (H&E)                                                                           | Empty CAR (IHC for CD3 & CD72)                                                                         | CD19 (H&E)                                                                   | CD19 (IHC for CD3 & CD72)                               | H24 (H&E)                                                                         | H24 (IHC for CD3 & CD72)                                |
|---------------------|-------------------------------------------------------------------------------------------|--------------------------------------------------------------------------------------------------------|------------------------------------------------------------------------------|---------------------------------------------------------|-----------------------------------------------------------------------------------|---------------------------------------------------------|
| Liver               | NSF                                                                                       | NSF                                                                                                    | Cellular infiltrate, mononuclear (large cell), rare                          | Cellular infiltrates negative for CD72 and CD3          | Cellular infiltrate, mononuclear (large cell), multifocal, mild                   | Nodular cellular infiltrate negative for CD3 and CD72   |
| Spleen              | Nodular cellular infiltrate (presumed lymphoid, large cell), multifocal, mild to moderate | CD72: Scattered CD72+ cells; CD3: Absence of CD3+ cells. Nodular aggregates negative for CD72 and CD3. | Nodular cellular infiltrate (presumed lymphoid, large cell), multifocal mild | CD72: Scattered CD72+ cells; CD3: Absence of CD3+ cells | Nodular cellular infiltrate (presumed lymphoid, large cell), multifocal, moderate | CD72: Scattered CD72+ cells; CD3: Absence of CD3+ cells |
| Kidney              | NSF                                                                                       | NSF                                                                                                    | NSF                                                                          | NSF                                                     | NSF                                                                               | NSF                                                     |
| Adrenal gland       | NSF                                                                                       | NSF                                                                                                    | NSF                                                                          | NSF                                                     | NSF                                                                               | NSF                                                     |
| Pancreas            | NSF                                                                                       | NSF                                                                                                    | NSF                                                                          | NSF                                                     | NSF                                                                               | NSF                                                     |
| Lung                | Minimal, alveolar histiocytosis                                                           | NSF                                                                                                    | Minimal, alveolar histiocytosis                                              | NSF                                                     | Minimal, alveolar histiocytosis                                                   | NSF                                                     |
| Heart               | NSF                                                                                       | NSF                                                                                                    | NSF                                                                          | NSF                                                     | Endocardiosis, mild                                                               | NSF                                                     |
| Stomach             | NSF                                                                                       | n/a                                                                                                    | NSF                                                                          | n/a                                                     | NSF                                                                               | n/a                                                     |
| Small Intestine     | NSF                                                                                       | n/a                                                                                                    | NSF                                                                          | n/a                                                     | NSF                                                                               | n/a                                                     |
| Large Intestine     | Mural hematoma; protozoa                                                                  | n/a                                                                                                    | Protozoa                                                                     | n/a                                                     | Protozoa                                                                          | n/a                                                     |
| Brain               | NSF                                                                                       | NSF                                                                                                    | NSF                                                                          | NSF                                                     | NSF                                                                               | NSF                                                     |
| Reproductive tract  | NSF                                                                                       | n/a                                                                                                    | NSF                                                                          | n/a                                                     | NSF                                                                               | n/a                                                     |
| Lower urinary tract | NSF                                                                                       | n/a                                                                                                    | NSF                                                                          | n/a                                                     | NSF                                                                               | n/a                                                     |
| Skin                | NSF                                                                                       | n/a                                                                                                    | NSF                                                                          | n/a                                                     | NSF                                                                               | n/a                                                     |

465

466 **Supplemental Table 3. Summary autopsy and immunohistochemistry (IHC) evaluation for**  
467 **mice who received H24 nanoCARs, CD19 CAR-T cells, or empty CAR-T cells.** NSG mice  
468 were injected with 1e6 luciferase-labeled SEM B-ALL cells on day -4, and on day 0 mice were  
469 treated with 3e6 CAR-T cells per mouse.  $n = 2$  mice per arm. On day 14, mice were sacrificed  
470 and H&E staining was done on all major organs was performed as part of a full murine autopsy.  
471 Immunohistochemistry against human CD3 was used to determine CAR-T infiltration in murine  
472 tissues, and CD72 to determine the presence of SEM tumor cells in different murine tissues. The  
473 table represents H&E and IHC results from the study, stratified by each organ system. Summary  
474 histopathologic findings from the two mice from each CAR-T treatment arm are reported in the  
475 table. A murine pathologist was blinded to the study design and determined that the following  
476 histopathologic features were incidental findings: the presence of protozoa in the intestinal tract  
477 (cecum), minimal alveolar histiocytosis, intestinal mural hematoma, focal renal tubule dilation,  
478 and a single instance of mild endocardiosis.  $n = 2$  mice for each CAR treatment arm. NSF = no  
479 significant findings. N/A = not available.

38
